# Supplementary material for: A positioned +1 nucleosome enhances promoter-proximal pausing
Source: Oxford University Press journal article supplement (doi:10.1093/nar/gkv149), 2015-03-03
Supplement: gkv149_Supplementary_Data.zip [file gkv149_Supplementary_Data.zip]

## Supplementary data

### Supplementary Figures and Legends

**Figure S1**

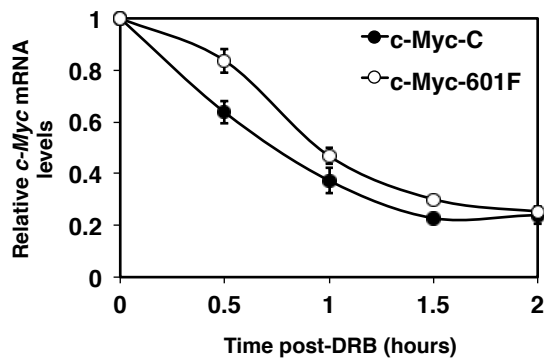

**Figure S1.** *c-Myc-C* and *c-Myc-601* mRNA degradation time course. (A) Cells were subjected to DRB treatment (100 $\mu$ M) and samples were harvested at the indicated time points. RNA was analyzed by RT-qPCR as described in Figure 2E. Time point prior DRB treatment was set to 1.

**Figure S2**

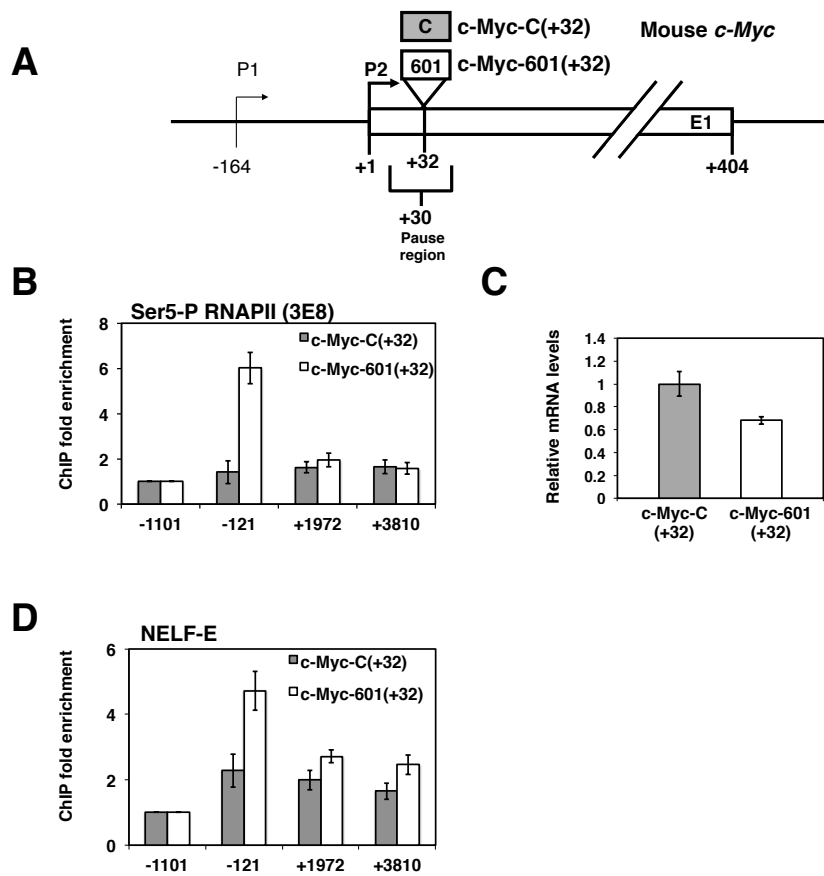

**Figure S2.** Increased promoter-proximal pausing under a strong +1 nucleosome positioning at position +32. (A) Schematic representation of promoter and exon 1 of the mouse *c-Myc* gene showing the position in which either the 601 sequence (601) or the control sequence (C) have been inserted. Distances (pb) of pause region and insertions from the transcription start site (TSS) are indicated below the gene. (B) RNAPII ChIP analysis of *c-Myc-601(+32)* and *c-Myc-C(+32)* genes. Ser5 phosphorylated form of RPB1 was immunoprecipitated using 3E8 antibody. ChIP values were normalized to the values from -1101 amplicon. (C) *c-Myc* mRNA levels measured by RT-qPCR using the primers c-Myc-1972-up and c-Myc-1972-low. Values were normalized to *GAPDH* amplification. *c-Myc-C* signal was set to 1. (D) NELF-E ChIP assay

in *c-Myc-601(+32)* and *c-Myc-C(+32)* genes as described in Figure 2B. Primer sequences are listed in Supplementary Table S1. Average and standard deviation from 2 independent experiments are displayed.

**Figure S3**

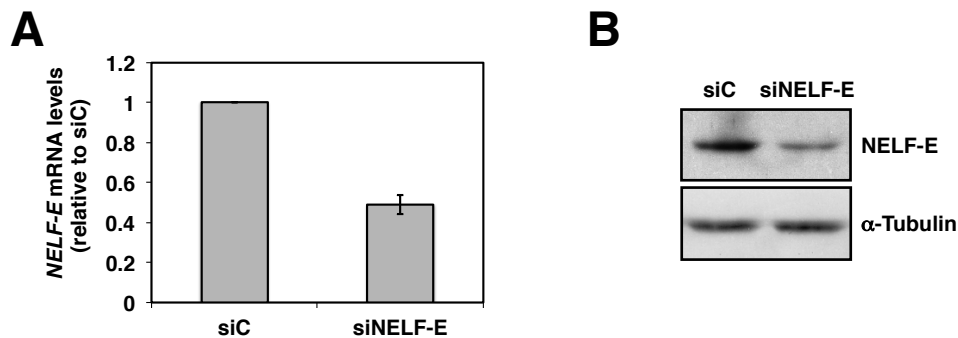

**Figure S3.** *NELF-E* downregulation. (A and B) *NELF-E* mRNA levels and *NELF-E* protein levels after *NELF-E* siRNA or control siRNA treatment measured by RT-qPCR and Western blot, respectively. Cells were harvested for RNA or protein extraction 72 hours after siRNA transfection. *GAPDH* amplification was used as RNA loading control and  $\alpha$ -tubulin was used as a protein loading control. *NELF-E* mRNA values were normalized to the control siRNA. Primers and siRNAs used are listed in Supplementary Table S1. Average and standard deviation from 3 independent experiments are displayed.

**Figure S4**

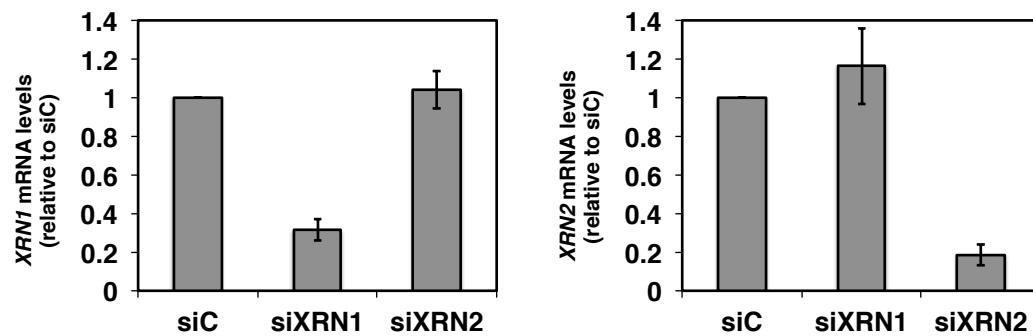

**Figure S4.** *XRN1* and *XRN2* downregulation. *XRN1* (left panel) and *XRN2* (right panel) mRNA levels three days after the indicated siRNA treatment. RNA extraction was carried out and levels of mRNA was determined by RT-qPCR. Control siRNA data were set to 1. Primers and siRNAs used are listed in Supplementary Table S1. Average and standard deviation from 3 independent experiments are displayed.

**Figure S5**

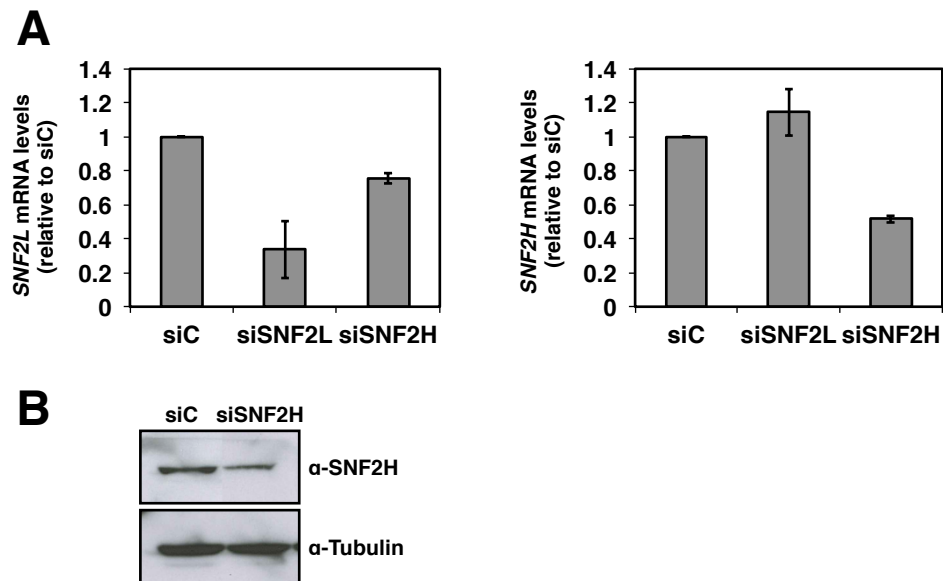

**Figure S5.** *SNF2L* and *SNF2H* downregulation. (A) *SNF2L* (left panel) and *SNF2H* (right panel) mRNA levels 72 hours after the indicated siRNA treatment. RNA extraction was performed and mRNA levels were determined by RT-qPCR. Primers and siRNA used are listed in Supplementary Table S1. Average and standard deviation from 3 independent experiments are displayed. (B) *SNF2H* protein levels after 72 hours of *SNF2H* or control siRNA treatment measured by Western blot.

## Supplementary Table

**Table S1.** Primer and siRNA sequences.

| Primer                       | Sequence                                                    |
|------------------------------|-------------------------------------------------------------|
| <b>c-Myc 601/ACTB (-38)</b>  | Up: CCCCTCCTGCCTCCTGAA<br>Low: CCTCTGTCTCTCGCTGGAATTAC      |
| <b>c-Myc 601/ACTB (+23)</b>  | Up: TGA CTGCTGTAGTAATTCCAGC<br>Low: TCCGCTCACTCCCTCTGTC     |
| <b>c-Myc 601/ACTB (+314)</b> | Up: AA ACTTTGCCCATTGCAGC<br>Low: AGGCAGAGAACACTGTCCCC       |
| <b>c-Myc 601/ACTB (+446)</b> | Up: CGTCTTGAATGTAGCGGCC<br>Low: TCCCTTCCCCTTTCCTCTG         |
| <b>c-Myc ACTB (+51)</b>      | Up: ATTCCAGCGAGAGACAGAGG<br>Low: GGATGCCACAGAATTCCAA        |
| <b>c-Myc ACTB (+58)</b>      | Up: AGCGAGAGACAGAGGGAGTG<br>Low: TGGAGTTGAAGGTAGTTTCGTG     |
| <b>c-Myc ACTB (+115)</b>     | Up: AGTAATTCCAGCGAGAGACAGAG<br>Low: CTGCAATGGGCAAAGTTTC     |
| <b>c-Myc ACTB (+132)</b>     | Up: AGTGTGACGTGGACATCCGC<br>Low: GGTACATGGTGGTGCCGC         |
| <b>c-Myc-601 (+51)</b>       | Up: AGCGAGAGACAGAGGGAGTG<br>Low: AAGCGGTGCTAGAGCTGTCT       |
| <b>c-Myc-601 (+101)</b>      | Up: AGACAGCTCTAGCACCGCTTA<br>Low: TATCTGACACGTGCCTGGAG      |
| <b>c-Myc-601 (+129)</b>      | Up: CTGGAGAATCCCGGTGCC<br>Low: CGTACGTGCGTTTAAGCGG          |
| <b>c-Myc-601 (+203)</b>      | Up: CTCCAGGCACGTGTCAGATA<br>Low: CCGCACTAGTGATTGGGAAT       |
| <b>c-Myc (+1)</b>            | Up: TGA CTGCTGTAGTAATTCCAGC<br>Low: TCCGCTCACTCCCTCTGTC     |
| <b>c-Myc (+481)</b>          | Up: CCATTCCTGTGCTTTTGACACTT<br>Low: CCCCTTTCCTCTGTCATCTTGAC |
| <b>c-Myc (+1972)</b>         | Up: GATGCCCCTCAACGTGAAC<br>Low: AAATAGGGCTGTACGGAGTCG       |
| <b>c-Myc (+3810)</b>         | Up: AGATGAGGAAGAAATTGATGTGG<br>Low: TCGGGATGGAGATGAGCC      |
| <b>c-Myc (-1101)</b>         | Up: TGTATGGGGTGTAGACCGGC<br>Low: ACTCCAGCACCTCCGGTTC        |
| <b>NELF-E</b>                | Up: GACATGACACCCACCCTTCT<br>Low: TGACGAAGGCACAGTTTCTG       |
| <b>XRN1</b>                  | Up: GCCCTGACTGGGATTAGTGT<br>Low: GCCCTGACTGGGATTAGTGT       |
| <b>XRN2</b>                  | Up: TCCTTCGGCTTAATGTTCTTC<br>Low: AGATGTGAACTCGTATTAGG      |
| <b>SNF2L</b>                 | Up: CCTCCAAAACAGCCAAATGT<br>Low: TTTGAGCCAGAGCTGGATTT       |
| <b>SNF2H</b>                 | Up: GAACTGCCTTAGCCACCTG                                     |

|                   |                                                                                    |
|-------------------|------------------------------------------------------------------------------------|
| <b>GAPDH</b>      | Low: ACCCATGAAGGGAGGAAACT<br>Up: GAGTCAACGGATTTGGTCGT                              |
| <b>28S</b>        | Low: AATGAAGGGGTCATTGATGG<br>Up: TACCCACCCGACCCGTCTTG<br>Low: CTGGAGAGGCCTCGGGATCC |
| <b>siRNA</b>      | <b>Sequence (reference)</b>                                                        |
| <b>NELF-E</b>     | GGCAUUGCUGGCUCUGAAGUU (1)                                                          |
| <b>XRN1</b>       | UGAUGAUGUUCACUUUAGA (2)                                                            |
| <b>XRN2</b>       | AAGAGUACAGAUGAUGAUGUU (3)                                                          |
| <b>SNF2L</b>      | UAACAUAGCUCGAGAGGUA (4)                                                            |
| <b>SNF2H</b>      | GGA AUGGUAUACUCGGAUA (4)                                                           |
| <b>Luciferase</b> | CGUACGCGGAUACUUCGA                                                                 |

### Supplementary References

1. Aiyar, S.E., Sun, J.L., Blair, A.L., Moskaluk, C.A., Lu, Y.Z., Ye, Q.N., Yamaguchi, Y., Mukherjee, A., Ren, D.M., Handa, H. *et al.* (2004) Attenuation of estrogen receptor alpha-mediated transcription through estrogen-stimulated recruitment of a negative elongation factor. *Genes Dev*, **18**, 2134-2146.
2. Stoecklin, G., Mayo, T. and Anderson, P. (2006) ARE-mRNA degradation requires the 5'-3' decay pathway. *EMBO Rep*, **7**, 72-77.
3. West, S., Gromak, N. and Proudfoot, N.J. (2004) Human 5' --> 3' exonuclease Xrn2 promotes transcription termination at co-transcriptional cleavage sites. *Nature*, **432**, 522-525.
4. Eckey, M., Kuphal, S., Straub, T., Rummele, P., Kremmer, E., Bosserhoff, A.K. and Becker, P.B. (2012) Nucleosome remodeler SNF2L suppresses cell proliferation and migration and attenuates Wnt signaling. *Mol Cell Biol*, **32**, 2359-2371.
